# 1 Probing the fabric of the rare biosphere

2  
3 Bibiana G. Crespo<sup>1\*</sup>, Philip J. Wallhead<sup>2</sup>, Ramiro Logares<sup>1</sup> and Carlos Pedrós-Alió<sup>1</sup>

4  
5 <sup>1</sup> Institut de Ciències del Mar, Consejo Superior de Investigaciones Científicas (ICM-CSIC).

6 Passeig Marítim de la Barceloneta, 37-49. 08003. Barcelona, Spain.

7 <sup>2</sup> Norwegian Institute for Water Research (NIVA), Thormøhlens gate 53D, N-5006 Bergen,  
8 Norway.

9  
10 Correspondence: Bibiana G. Crespo, Uni Research Environment, Center for Applied

11 Biotechnology, Thormøhlens gate 49B, N-5006 Bergen, Norway.

12 Email: [bibianagc@hotmail.com](mailto:bibianagc@hotmail.com)

13  
14 <sup>\*</sup>Present address: Uni Research Environment, Center for Applied Biotechnology,

15 Thormøhlens gate 49B, N-5006 Bergen, Norway.  
16  
17  
18  
19  
20  
21  
22  
23  
24  
25

26 Abstract: The relatively recent development of high-throughput sequencing (HTS)  
27 techniques has revealed a wealth of novel sequences found in very low abundance: the rare  
28 biosphere. Today, most studies of diversity of microorganisms are carried out almost  
29 exclusively with HTS techniques. However, culturing seems indispensable for diversity  
30 studies especially if the aim is exploring the rare biosphere. We have carried out a deep (1  
31 million sequences per sample) pyrosequencing analysis of two marine bacterial samples and  
32 isolated a culture collection from one of them. We have shown that the collectors curves of  
33 the pyrosequencing data were close to reaching an asymptote. We have estimated the total  
34 richness of the samples and the sequencing effort necessary to obtain the total estimated  
35 richness experimentally. Comparing the pyrosequencing data and the isolates sequences we  
36 have found that isolation retrieves some of the rarest taxa and that the composition of rare  
37 taxa follows an annual succession. We have shown that increasing the number of tags  
38 sequenced would slowly uncover the isolated bacteria. However, even if the whole bacterial  
39 diversity was found by increasing the sampling depth, culturing would still be essential for  
40 the study of marine bacterial communities, especially if the target is the rare biosphere.

41

42

## 42 **Introduction**

43 The question of how many species of living beings are there on Earth has intrigued  
44 ecologists and evolutionary scientists for decades (May, 1988; Erwin, 1991). One of the most  
45 recent estimates considered a number of 8.7 million species, but excluded bacteria and  
46 archaea from the estimate due to our ignorance of the microorganisms (Mora *et al.*, 2011).  
47 The International Census of Marine Microbes attempted to map the diversity of microbes in  
48 the oceans with novel high throughput sequencing techniques (Amaral-Zettler *et al.*, 2010)  
49 but a global estimate was not attempted. Some estimates for marine bacterial species range  
50 from  $10^4$  to  $10^6$  based on different assumptions (Curtis *et al.*, 2002; Hagström *et al.*, 2002).  
51 Such a range of values, spanning several orders of magnitude, shows that we are far from a  
52 reasonable estimate.

53

54 Traditionally, bacteria were isolated in pure culture and then characterized biochemically  
55 and genetically until a new species could be formally described. It was realized that the  
56 bacteria able to grow in culture media were a small fraction of the bacterial cells that could be  
57 directly counted on a filter, a discrepancy named the “great plate count anomaly” (Staley &  
58 Konopka, 1985). Different studies estimated that only about 1% of the cells in natural waters  
59 could be cultivated (Pace, 1997; Eilers *et al.*, 2000). Moreover, most of the cells in pure  
60 cultures were not the abundant ones in nature.

61

62 After the application of molecular cloning to natural systems (Giovannoni *et al.*, 1990;  
63 Pace, 1997) a wealth of new taxa were found and, this time, they were the abundant ones in  
64 the oceans (DeLong, 1997; Pace, 1997). The drawback was that a sequence of the 16S rDNA  
65 did not provide much information about the physiology of the organism. Further, the

66 realization that bacteria obtained in culture were mostly different from bacterial sequences  
67 obtained in clone libraries, produced what could be called the “great clone library anomaly”.  
68 Molecular methods could retrieve many sequences from the abundant organisms but missed  
69 the rare ones, and only occasionally a rare clone was found. Isolation, on the other hand,  
70 retrieved mostly rare bacteria and, occasionally an abundant one. This anomaly was a  
71 consequence of the fact that natural assemblages are formed a by a few taxa in very large  
72 concentrations and many taxa in very low concentrations. The problem can be easily  
73 visualized by looking at a rank-abundance curve (Pedrós-Alió, 2006). Primers for clone  
74 libraries will hybridize with the most abundant sequences over and over again before they  
75 find a rare target. Thus, only a fraction of the community will be available to cloning and  
76 sequencing. The relatively recent development of high-throughput sequencing (HTS)  
77 techniques and their application to natural microbial communities (Sogin *et al.*, 2006) now  
78 provides an opportunity to solve the “great clone library anomaly”.

79  
80 The study of microbial communities with such technologies has revealed a wealth of novel  
81 sequences found in very low abundance: the rare biosphere (Sogin *et al.*, 2006). And different  
82 properties of the latter have been examined (Galand *et al.*, 2009; Jones & Lennon, 2010;  
83 Pedrós-Alió, 2012; Caporaso *et al.*, 2012; Lynch *et al.*, 2012; Gibbons *et al.*, 2013). Today,  
84 most studies of diversity of microorganisms are carried out almost exclusively with such HTS  
85 techniques. Yet, culturing seems indispensable for diversity studies (Donachie *et al.*, 2007;  
86 Shade *et al.*, 2012; Lekunberri *et al.*, 2014), especially if the aim is exploring the rare  
87 biosphere. In this regard, Shade *et al.* (2012) compared the outputs of a shallow (~ 2 000  
88 sequences per sample) pyrosequencing analysis of the bacteria collected from a soil sample  
89 and the isolates cultured from the same sample. They found that 61% of the cultured bacteria

90 were not present in the pyrosequencing dataset, demonstrating that culturing provided a  
91 fruitful route to the rare biosphere that was complementary to sequencing. These authors  
92 postulated that they would have found that remaining cultured bacteria in the pyrosequencing  
93 dataset if they had increased the sequencing depth.

94

95 But the question “can all the bacterial taxa isolated in culture from a sample be found by  
96 HTS?” has not been addressed in a direct and sufficiently exhaustive way. This question has  
97 several implications. First, an in depth comparison of both cultures and sequences should  
98 eventually solve the “great clone library anomaly”. Second, it should provide an estimate of  
99 the total number of bacterial taxa in a sample. And third, it would allow a calculation of the  
100 sequencing effort necessary to retrieve all the diversity in a sample. We have addressed this  
101 question by carrying out a deep (1 million sequences per sample) pyrosequencing analysis of  
102 two marine bacterial samples and isolating a culture collection from one of them.  
103 Comparison of both data sets allowed us to bracket the dimensions of the rare biosphere, at  
104 least in these two marine samples.

105

## 106 **Material and methods**

### 107 *1. Study area and sampling*

108 Samples were taken in the NW Mediterranean Sea during cruise SUMMER between 13<sup>th</sup>  
109 and 22<sup>nd</sup> of September 2011, on board the RV “García del Cid”. Specifically, the samples for  
110 this study were collected at Station D, an open sea station at 40°52’N and 02°47’E (Table 1,  
111 and Pedrós-Alió *et al.*, 1999). The surface sample was taken at 5 m on 15<sup>th</sup> September and the  
112 bottom sample was collected at 2 000 m depth on 17<sup>th</sup> September.

113

114 Sampling was done with Niskin bottles mounted on a rosette with a conductivity-  
115 temperature-depth (CTD) profiler. Water was prefiltered through a 200  $\mu\text{m}$  mesh and  
116 immediately processed on board. To collect microbial biomass, between 5 and 15 L of  
117 sea-water were prefiltered through a 3  $\mu\text{m}$  pore size Durapore filter (Millipore, Cork, Ireland)  
118 and free-living bacterial biomass was collected on a 0.22  $\mu\text{m}$  pore size Sterivex filter  
119 (Durapore, Millipore). The filtration was done in succession using a peristaltic pump. The  
120 0.22  $\mu\text{m}$  pore size Sterivex unit was filled with 1.8 ml of lysis buffer (40 mM EDTA, 50 mM  
121 Tris-HCl, 0.75 M sucrose) and stored at  $-80^{\circ}\text{C}$ . DNA was extracted by a standard protocol  
122 using phenol/chloroform (details in Schauer *et al.*, 2003).

123

## 124 2. 454-pyrosequencing and noise removal

125 Purified DNA samples were submitted to the Research and Testing Laboratory (Lubbock,  
126 Texas, USA) for amplification of the 16S rRNA gene. Tag-pyrosequencing was done with  
127 Roche 454 Titanium platform following manufacturer protocols (454 Life Science). Primers  
128 28F (5'-GAGTTTGATCCTGGCTCAG) and 519R (5'-GTNTTACNGCGGCKGCTG) were  
129 used for amplification of the hypervariable regions V1-V3; approximately 400 bp long tags  
130 were obtained. PCR and subsequent sequencing are described in Dowd *et al.* (2008). 713 076  
131 and 970 346 tags were retrieved from the surface and the bottom samples, respectively (Table  
132 1). These data has been deposited in EMBL with accession number PRJEB9061.

133

134 The raw tag-sequences were processed using QIIME (Caporaso *et al.*, 2010). Briefly, to  
135 reduce sequencing errors and their effects, the multiplexed reads were first trimmed, quality-  
136 filtered and assigned to the samples, surface or bottom. The filtering criteria included a  
137 perfect match to the sequence barcode and primer, at least 400 bp in length, a quality score

138 window of 50 bp and a minimum average quality score of 28. Additionally, denoising was  
139 used to reduce the amount of erroneous sequences (Quince *et al.*, 2011). The final number of  
140 tags was reduced after this processing to 500 262 for the surface sample and to 574 960 for  
141 the bottom sample (Table 1). The sequences were then clustered into Operational Taxonomic  
142 Units (OTUs) based on the relatedness of the sequences (97% similarity) with UCLUST.  
143 Afterwards, a representative sequence from each OTU was selected. To identify potential  
144 chimera sequences, the dataset was subjected to the ChimeraSlayer implemented in Mothur  
145 (Schloss *et al.*, 2011). Then, taxonomy assignment was made with QIIME by searching the  
146 representative sequences of each OTU against the SILVA 16S/18S rDNA non-redundant  
147 reference dataset (SSU Ref 108 NR) (Quast *et al.*, 2013) using the Basic Local Alignment  
148 Search Tool (BLAST) and an e-value of 0.03. Chimera, chloroplast, eukarya and archaea  
149 sequences were removed from the output fasta file that was used for building a table with the  
150 OTU abundance of each sample and the taxonomic assignments for each OTU.

151

152 In addition to the sequences obtained in the present study, we used a 454 pyrosequencing  
153 dataset from cruise MODIVUS, for comparative purposes. Cruise MODIVUS took place in  
154 September 2007 and sampled a transect between the Blanes Bay Microbial Observatory  
155 (BBMO, <http://www.icm.csic.es/bio/projects/icmicrobis/bbmo/>), a coastal sampling site north  
156 of Barcelona (41°40'N, 02°48'E) and Station D (40°52'N, 02°47'E), the open sea station  
157 sampled here. The samples used for pyrosequencing included surface samples along the  
158 transect and a vertical profile down to 2000 m at Station D. The MODIVUS data have been  
159 published in Pommier *et al.* (2010) and Crespo *et al.* (2013). Due to the limitations of the  
160 technique at the time, these sequences only included de V3 region of the 16S rDNA (~68 bp).

161

### 162 3. Isolation of bacterial cultures

163 Isolates were obtained on board by plating 100 µl of undiluted and 10x diluted sea-water  
164 from the surface sample, in triplicates, onto modified Zobell agar plates (i.e. 5 g peptone, 1 g  
165 yeast extract and 15 g agar in 1 l of 0.2 µm filtered 75% sea water). Agar plates were  
166 incubated at *in situ* temperature (~20 °C), in the dark, for 14 days. 326 bacterial colonies  
167 were selected and the cultures were subsequently purified by re-isolation three times in a  
168 month. Next, isolates were grown at 20 °C on the same liquid medium and stored at -80 °C  
169 with 25% (v/v) glycerol. 200 µl of these cultures were placed in 96 well plates, diluted 1:4 and  
170 heated (95°C, 10 min) to cause cell lysis, so available DNA could be used as a template in  
171 Polymerase Chain Reactions (PCR). PCR, using Taq polymerase (Boehringer-Mannheim), of  
172 the Internal Transcribed Spacer (ITS) were done to select as many different species as  
173 possible from the 326 isolates. ITS length is species specific and therefore allows to  
174 differentiate the isolates (Fisher & Triplett 1999; Scheinert *et al.* 1996). ITS amplification  
175 was done using primers ITS-F (5'-GTCGTAACAAGGTAGCCGTA) and ITS-R  
176 (5'-GCCAAGGCATCCACC) and the following thermal conditions: 94°C for 2 min, then 32  
177 cycles of 94°C for 15 sec, 55°C for 30 sec, 72°C for 3 min, followed by one cycle of 72°C for  
178 4 min and 4°C on hold. According to their different ITS patterns, 148 isolates were chosen  
179 out of 326, including some replicates, and their 16S rRNA gene were then amplified using  
180 bacterial 16S rRNA gene primers 27F (5'-AGAGTTTGATCMTGGCTCAG) and 1492R (5'-  
181 GTTTACCTTGTTACGACTT). The thermal conditions were as follows: 94°C for 5 min,  
182 then 30 cycles of 94°C for 1 min, 55°C for 1 min, 72°C for 2 min, followed by one cycle of  
183 72°C for 10 min and 4°C on hold. Nearly the full-length 16S rRNA gene (aprox. 1 300 bp)  
184 was sequenced in GENOSCREEN (Lille Cedex, France). Taxonomical assignment was done  
185 by BLAST searches in the National Center for Biotechnology Information (NCBI) website.



186 The 16S rRNA sequences have been deposited in EMBL with accession numbers LN845965  
187 to LN846112.

188

189 In addition to the SUMMER culture collection obtained for the present study, we also  
190 used three previously isolated collections for comparison. The isolation procedures were the  
191 same as above, but the samples were collected at the Blanes Bay Microbial Observatory  
192 (BBMO). Station D sampled in the present work is about 100 km offshore from the BBMO.  
193 Culture collection BBMO-1 consisted of over 300 isolates collected between 2001 and 2004  
194 at different times of the year. Collections BBMO-2 and BBMO-3 were smaller collections  
195 isolated in February and September 2007 respectively. Since these cultures were isolated and  
196 used for different purposes, many of them had only partial sequences of the 16S rDNA. A  
197 description of these collections was published in Lekunberri *et al.* (2014).

198

#### 199 4. Richness, sampling effort estimates, and diversity of 454 pyrosequencing data

200 Richness (S) was computed as the total number of OTUs (97% similarity) in each sample.  
201 Estimates of total richness were calculated using two packages of the free software R (R Core  
202 Team, 2013). The “vegan” package (Oksanen *et al.*, 2013) was used for non-parametric  
203 ( $S_{\text{Chao}}$ , Abundance-based Coverage Estimator [ACE]) estimations. The “drc” package (Ritz &  
204 Streibig, 2005) was used to estimate richness by fitting the species accumulation curves to a  
205 mathematical function. We fitted several mathematical functions to our data (Flather, 1996).  
206 The best fits were given by Michaelis-Menten, Rational, and Weibull Cumulative functions.  
207 The three parameter Weibull Cumulative function was the best of all according to the  
208 coefficient of determination ( $R^2$ ), the residual sum of squares (RSS), and Akaike’s

209 information criterion (AIC) (Supplementary Table 1). The Weibull cumulative function takes  
210 the form:

$$211 \quad a (1 - \exp(-bx))^c$$

212 where a, b and c are fitted coefficients, and a is the maximal number of species predicted by  
213 the model, i.e. the asymptote.

214 The sampling effort necessary to obtain 99% and 99.9% of total estimated richness was  
215 calculated from the extrapolation of the species accumulation curves by fitting the Weibull  
216 Cumulative function and from the non-parametric estimation of Chao 1 using the method  
217 described in Chao *et al.* (2009).

218 Shannon (H') and Simpson (D) diversity indexes were used to calculate diversity:

$$219 \quad H' = - \sum p_i \ln(p_i) \quad (1)$$

$$220 \quad D = 1 - \sum p_i^2 \quad (2)$$

221 where  $p_i = N_i/N$ , the number of individuals of species *i* divided by the total number of  
222 individuals in the sample (N). Finally, evenness was computed with the Pielou index:

$$223 \quad J' = H' / H_{\max} \quad (3)$$

224 where H' is the Shannon diversity index and  $H_{\max}$  is the maximal possible Shannon diversity  
225 index if all the species were equally abundant:

$$226 \quad H_{\max} = - \sum (1/S) \ln(1/S) = \ln S \quad (4)$$

227 where S is the total number of OTUs (richness). Diversity and evenness of each sample were  
228 calculated using the “vegan” package (Oksanen *et al.*, 2013).

229 Rank-abundance plots of the isolated cultures and the 454 pyrosequencing data were done  
230 using the “BiodiversityR” package (Kindt & Coe, 2005) and the accumulation curves using  
231 the “vegan” package (Oksanen *et al.*, 2013) of R (R Core Team, 2013).

232

233 *5. Comparison of 454-pyrosequencing tags and isolates*

234 Comparison between isolates and 454 tag-sequences was done running BLASTn locally.

235 Thus, the isolate sequences were searched for in the 454 tag-sequence datasets and vice

236 versa, and only the reciprocal matches between these two searches were considered. The

237 output was filtered using R (R Core Team, 2013) according to a 99% of identical nucleotide

238 matches, 75%-100% of coverage of the isolate sequence and a bit-score higher than 100. In

239 all the cases the e-value was lower than 0.0001.

240

241 Since the primers used for Sanger sequencing of the isolates and those used for the

242 pyrosequencing of the environmental DNA were different, the possibility existed of different

243 biases that could prevent detection of the cultures in the 454 dataset. Multiple alignments of

244 the sequences of the isolates and the sequences of the primers used in the pyrosequencing

245 analysis were done using the software Genious. The multiple alignments were used to check

246 that the 454 primers hybridized with the sequences of all the isolates.

247

248 In order to estimate the sequencing effort necessary to find all the isolates in the sequence

249 dataset, we did a kind of “rarefaction” analysis with detected isolates in the Y-axis and

250 number of 454 sequences or number of OTUs in the X-axis. The 454 tag-sequences were

251 subsampled in 5% intervals 1000 times and the percentage of coincidence with the isolate

252 sequences was calculated for each new 454 tag-sequence dataset and plotted against the

253 corresponding number of sequence tags analyzed. The same was done with the number of

254 OTUs. Calculations were done using R (R Core Team, 2013).

255

## 256 **Results**

### 257 *1. Pyrosequencing dataset*

258 Richness (S), computed as the total number of OTUs, was higher in the bottom (4 460)  
259 than in the surface (1 400) sample (Table 1). In both samples only ~17% of the OTUs were  
260 singletons (an OTU represented by a single sequence) (Table 1). Evenness ( $J'$ ) and diversity  
261 ( $H'$  and  $D$ ) were also higher in the bottom than in the surface sample (Table 1). Richness  
262 estimations calculated with non-parametric methods, Chao Index and ACE, and with  
263 parametric methods (Figure 1) were slightly higher than the actual number of OTUs (S)  
264 observed as expected (Table 1). None of the estimates were significantly different from each  
265 other (z-tests on the differences, all  $P > 0.05$ ). The mathematical function that best fitted the  
266 species accumulation curves was the Weibull Cumulative function (99% model efficiency or  
267  $R^2 = 0.99$ ) (Figure 1). Fitting the species accumulation curve allowed both calculation of the  
268 total richness of the samples by extrapolation (as explained above), and estimation of the  
269 sequencing effort necessary to obtain the total estimated richness experimentally (Table 1).  
270 Our estimates indicated that the sequencing effort necessary to retrieve 99% and 99.9% of the  
271 total estimated richness should be 4 to 8 times higher than the one applied in this study (Table  
272 1). These numbers are approximately twice higher than the estimations obtained from the  
273 Chao index (Chao *et al.*, 2009) (Table 1).

274

275 Rank-abundance curves (Figure 2) showed that the bacterial assemblages from both  
276 samples were characterized by few abundant and many rare OTUs. The most abundant OTU  
277 was more abundant in the surface than in the bottom sample, in agreement with the lower  
278 evenness found for the surface sample (Table 1). The abundance of the most abundant OTU

279 in the bottom sample was close to the abundance of the second most abundant OTU in the  
280 surface sample.

281

## 282 2. Culture collection

283 Bacterial isolation from the sample collected at the surface retrieved 148 cultures  
284 belonging to 38 different species. The most frequent bacterium in the collection was  
285 *Erythrobacter citreus*, isolated 37 times, while 17 species were isolated only once. A rank  
286 abundance plot of the 38 species can be seen in Fig. 3. The isolates belonged to the phyla  
287 *Actinobacteria* (4 isolates), *Bacteroidetes* (4 isolates) and *Firmicutes* (2 isolates) and to the  
288 *Proteobacteria* classes *Alpha-proteobacteria* (18 isolates) and *Gamma-proteobacteria* (10  
289 isolates). The names of all the isolates are shown in Table 2 and supplementary Table 2.

290

## 291 3. Comparison of isolates and sequences

292 Only 14 (37%) of the 38 different species were found in the 454 tag-sequence datasets:  
293 one *Actinobacteria*, two *Bacteroidetes*, two *Firmicutes*, four *Alpha-proteobacteria* and five  
294 *Gamma-proteobacteria* isolates (Figure 3, Table 2). Surprisingly, the number of cultures  
295 found in the 454 tag-sequence dataset was higher in the sample collected at 2 000 m (37%)  
296 than in the surface sample (24%), even though the latter was the sample used for isolation of  
297 the bacterial cultures (Figure 3, Table 2). Nine species were found in the sequences from both  
298 samples (maroon in Figure 3), 5 were found in the bottom sample only (green in Figure 3)  
299 and 24 were not found in either sample (empty symbols in Figure 3). Practically all the 454  
300 tag-sequences that matched the sequences from the isolates belonged to rare OTUs (<1% of  
301 the total tags). Only the OTU matching the isolate *Alteromonas macleodii* str. ‘Balearic Sea  
302 AD45’ (*Gamma-Proteobacteria*) was somewhat abundant (1.3%) in the bottom sample

303 (Table 2). Further, all the matching sequences made a larger percentage of the assemblage at  
304 the bottom sample than at the surface sample.

305

306 In order to examine the rate of appearance of cultured species in the sequence database,  
307 we calculated a kind of “rarefaction curves”, by randomly resampling either the OTUs or the  
308 454-pyrosequencing tags in 5% increases, and checking how many cultured species had been  
309 found in each case (Figure 4). These curves showed that the rate of appearance of the isolates  
310 in the 454 tags datasets as the sequencing depth increased was slower for tags than for OTUs  
311 but in neither case was an asymptote reached (Figure 4). The rate of increase of retrieved  
312 isolates versus OTUs was constant, but the rates were different at the two depths: one new  
313 isolate was retrieved every 50 OTUs in the surface sample and every 117 OTUs in the bottom  
314 sample (Figures 4A-B). The increase in retrieved isolates with respect to the number of tags  
315 showed a nonlinear response, implying that the sampling effort had to increase as the number  
316 of isolates increased (Figures 4C-D).

317

#### 318 *4. Comparisons across different times and locations*

319 Three additional culture collections, isolated in the same way as the collection described  
320 above (see material and methods), were available for comparisons with 454-pyrosequencing  
321 data (A in Table 3). In addition to the 454-pyrosequencing dataset obtained in the present  
322 study, 454 sequences from the MODIVUS cruise in September 2007 were also available (see  
323 material and methods). These different datasets offered the possibility to compare how  
324 effective was the retrieval of isolated species in 454 sequence datasets at different time and  
325 space scales (B and C in Table 3). The number of cultures from each collection (columns 2  
326 and 4 in Table 3) that could be compared to the two 454 datasets (B and C in Table 3) was

327 different because the 16S rRNA fragments sequenced were different (see material and  
328 methods).

329

330 Column 3 (Table 3) shows that the percent of cultures retrieved was much higher from the  
331 simultaneously taken culture collection (37%) than from those taken years before (~ 10%).

332 Likewise, column 5 (Table 3) shows that the percent of cultures isolated the same year of the  
333 cruise MODIVUS was higher (83% and 80%) than with those isolated earlier (44% in 2001-  
334 2004) or later (74% in 2011). The cultures collected the same year but at a different date  
335 (February 2007) were retrieved almost with the same efficiency as those collected on the  
336 same dates (80%).

337

338 The next comparisons examine the efficiency of retrieval at different space scales.

339 Columns 5 and 6 (Table 3) show the difference in percent of cultures found in the  
340 MODIVUS database if the whole set of sequences is considered (including a transect and a  
341 vertical profile, column 5 in Table 3) or if only the sequences from BBMO are used for the  
342 comparison (column 6 in Table 3). For the three BBMO collections the percent increased  
343 when a larger area was considered. The same can be observed in columns 5, 7 and 8 (Table  
344 3) for the SUMMER culture collection: when only the sequences from the open sea station  
345 were included, the percentages recovered were 24 (for the surface sequences) and 34 (for the  
346 bottom sequences). When the whole MODIVUS dataset was included, 74% of the cultures  
347 were retrieved. Surprisingly, this percentage is larger than that of the SUMMER 454 dataset.  
348 This occurred despite the fact that the SUMMER data set had many more sequences  
349 ( $1.7 \times 10^6$ ) than the MODIVUS dataset ( $3 \times 10^5$ ).

350

## 351 **Discussion**

### 352 *1. Estimates of richness.*

353 A large proportion of the microbial world is invisible to traditional cultivation approaches  
354 but it can be accessed using molecular tools (DeLong, 1997). The first cloning and Sanger  
355 sequencing approaches revealed a wealth of new taxa in the oceans (Giovannoni *et al.*, 1990).  
356 The number of clones examined however, was still too limited and there was a discrepancy  
357 between the taxa obtained in pure culture and by cloning and sequencing (Pedrós-Alió,  
358 2006). The development of massive parallel sequencing technologies in the last decade has  
359 helped to uncover a large fraction of the hidden diversity of marine microorganisms (Sogin *et al.*  
360 *al.*, 2006; Pedrós-Alió, 2012). In a previous study (Pommier *et al.*, 2010) we used  
361 pyrosequencing of the V6 region of the 16S rDNA gene to estimate richness of the bacterial  
362 assemblages in the NW Mediterranean Sea. Around 20 000 tag sequences were obtained per  
363 sample. For the surface and deep samples from station D, we found 632 and 2 065 OTUs  
364 respectively and using the Chao estimate these translated into estimated richness of 1 289 and  
365 4 156 OTUs for surface and deep samples respectively. It is well know that the number of  
366 new species retrieved increases with sampling size and sampling effort (Preston, 1960;  
367 Magurran, 1988; Rosenzweig, 1995) and a large part of the diversity remains hidden due to  
368 sampling limitations (Chao *et al.*, 2009; Gotelli & Colwell 2011). Therefore, taking  
369 advantage of the increasing sampling depth of pyrosequencing, we obtained 1 million raw  
370 16S rRNA gene tag-sequences per sample, trying to achieve realistic estimates of the whole  
371 bacterial diversity in our samples.

372

373 Our collector curves were close to reaching an asymptote (Figure 1). The relatively low  
374 percentage of singletons (~17%) found in this study compared to the higher percentage (40%-



375 60%) in the previous study (Pommier *et al.*, 2010) indicates a good coverage of the whole  
376 bacterial richness. By increasing the number of tags per sample from 20 000 to 1 000 000 we  
377 increased the number of OTUs from 632 to 1 400 at the surface and from 2 065 to 4 460 at  
378 the bottom. The Chao estimators were relatively close in both studies: 1 289 vs 1 643 and  
379 4 156 vs 5 029 for surface and bottom samples respectively. This suggests that the  
380 sequencing effort carried out in the present study is not necessary for a general evaluation of  
381 the richness of a marine sample, which is good news for further routine studies. However, we  
382 needed this effort to answer the questions discussed below.

383

384 The Chao index is based on the number of singletons and doubletons. We wanted to use  
385 all the information contained in the species accumulation curves to get a more robust estimate  
386 of richness. After testing several options, the Weibull cumulative function proved to be  
387 excellent. The extraordinary good fit (99% model efficiency) of this function to the species  
388 accumulation curves (Figure 2) gives confidence to the richness estimations made by  
389 extrapolation. Again, it is good for further studies that there were no significantly differences  
390 from the non-parametric estimations (z-tests on the differences,  $P > 0.05$ ). The Weibull  
391 cumulative function has been satisfactorily fitted to species accumulation curves of well-  
392 sampled communities of birds (Flather, 1996), reptiles (Thompson *et al.*, 2003), snakes (van  
393 Rooijen, 2012), butterflies (Jiménez-Valverde *et al.*, 2006) and microplankton (Cermeño *et al.*,  
394 2014). We also fitted the model to a marine bacterial sample collected in the Western  
395 English Channel (Caporaso *et al.*, 2012; Gibbons *et al.*, 2013). This sample was sequenced at  
396 an extraordinary depth (on the order of  $10^7$  Illumina tags) and we also found a good fit  
397 ( $R^2=0.99$ ). The fit was better when singletons were included in the analysis (the AIC value  
398 was lower, supplementary Fig. 1). Therefore, the Weibull cumulative function will be a very

399 useful tool to characterize the species accumulation curves and to obtain robust richness  
400 estimates, at least for well-sampled bacterial communities.

401

402 The high abundance of the most abundant OTU in the surface sample (Figure 2) may have  
403 caused less OTUs to be uncovered, forcing the richness to appear lower at the surface sample  
404 than at the bottom sample. However, higher richness as well as higher diversity at the bottom  
405 than at the surface have been reported before for the sampling area (Pommier *et al.*, 2010).  
406 Also, the high number of sequences examined and the richness estimations (Table 1) leave  
407 not doubt that a high percentage of the rare OTUs were sampled. Moreover, the number of  
408 OTUs in both samples was close to the number of OTUs estimated by other authors for the  
409 upper ocean (Rusch *et al.*, 2007; Pommier *et al.*, 2010; Crespo *et al.*, 2013) and deep waters  
410 (Salazar *et al.*, submitted).

411

412 The study of the English Channel mentioned above (Caporaso *et al.*, 2012; Gibbons *et al.*,  
413 2013) is particularly relevant for our analysis. Station L4 was very deeply sequenced (10  
414 million sequences) by Illumina. The sequences were then compared to pyrosequencing data  
415 from 72 samples collected along the seasons through six years (Caporaso *et al.*, 2012) or to  
416 the ICoMM pyrosequencing samples from around the world's oceans (Gibbons *et al.*, 2013).  
417 The purpose of this exercise was to see whether the collectors curve could be saturated with  
418 sufficiently deep sequencing and whether the rare biosphere of one site, at one particular  
419 time, included all the taxa found at that site through the years. Caporaso *et al.* (2012) found  
420 that around 95% of the OTUs in the combined seasonal samples could be found in the one  
421 deeply sequenced sample. Thus, the conclusion was that the rare biosphere included all the  
422 taxa that were abundant at L4 at one time or another. "This suggested that the vast majority

423 of taxa identified in this ecosystem were always present, but just in different proportions”  
424 (Caporaso *et al.*, 2012).

425

426 However, there are some caveats in interpreting this data set. The number of OTUs found  
427 by pyrosequencing in the combined 72 samples was 13 424. We think this agrees well with  
428 our estimates of 2 000 to 5 000 OTUs in one single sample. A fourfold increase in OTUs  
429 when analyzing 72 samples collected through the seasons instead of 1 sample seems  
430 reasonable. On the other hand the deep Illumina sampling produced 116 107 OTUs, which is  
431 one order of magnitude higher.

432

433 Several issues must be considered. First, these authors found that 45-48% of their OTUs  
434 were singletons. Given that the data sets consisted of over  $8 \times 10^5$  sequences (seasonal  
435 samples) and the other of over  $10^7$  sequences, these very large percentages of singletons are  
436 intriguing. In a previous study of the Mediterranean, we found a similar percentage of  
437 singletons (46%) with a lower number of sequences ( $\approx 2 \times 10^5$ ) (Pommier *et al.*, 2010; Crespo  
438 *et al.*, 2013). However, with the increase in sequences to  $5 \times 10^5$  in the present study of the  
439 same area, the number of singletons was reduced to 17%. A reduction in percent of singletons  
440 with an increase in sequencing depth is what one would expect and is what other studies have  
441 found (Wall *et al.*, 2009; Penton *et al.*, 2013). Thus, we find the results of Caporaso *et al.*  
442 (2012) and Gibbons *et al.* (2013) surprising.

443

444 Second, most of the OTUs in Caporaso *et al.* (2012) could not have a taxonomy ascribed,  
445 even after exclusion of singletons. More than half were “unclassified bacteria” and about  
446 10% were “unclassifiable (reads too short)” (see their Figure 1C). Thus, only about 40% of

447 the OTUs could be classified. Again, this very low figure is intriguing. The short read length  
448 cannot be the reason, because in our earlier studies, we used exactly the same methodology  
449 and read length as for the seasonal samples from the English Channel or the world ocean  
450 samples from ICoMM and yet, 98.9% of our OTUs could be assigned a taxonomy at least at  
451 the Phylum level and most of the time at the Class level. Obviously, different criteria for  
452 assignment of identity can be responsible for this, but the 10% of sequences labeled as  
453 “unclassifiable (reads too short)” should probably have been discarded.

454

455 We used the data from their deep sequenced L4 sample to try the Weibull fit and found a  
456 good fit, both with and without the singletons. In both cases the number of OTUs was one  
457 order of magnitude higher than our estimates (40 000 and 100 000 OTUs without and with  
458 singletons respectively). It is difficult to integrate these very different estimates of richness.  
459 We see three possibilities. First, if both data sets and sequence processing are correct the  
460 English Channel could have ten times more species than the Mediterranean Sea. We find this  
461 possibility very unlikely, since both environments correspond to relatively open seawater.  
462 Second, perhaps the procedure chosen for OTU calling with the L4 data set overestimated the  
463 number of OTUs. As explained, the number of OTUs found in the seasonal samples was  
464 coherent with our estimates. The number of OTUs with the Illumina sequences, on the other  
465 hand was one order of magnitude higher. We believe that the current processing of  
466 pyrosequencing data is quite robust (Quince *et al.*, 2011). Processing of Illumina tags,  
467 however, was still in its infancy when the studies mentioned above were carried out. Thus,  
468 the possibility exists of an overestimation of diversity. This is actually what happened in the  
469 first application of pyrosequencing to marine bacterial diversity in Sogin *et al.* (2006). Later  
470 studies found ways to properly clean the sequences and estimates became lower (Huse *et al.*,

471 2010; Quince *et al.*, 2011). We think this is the most likely explanation. Finally, there could  
472 be some methodological issue that caused an increase in diversity when the number of  
473 sequences increased by one order of magnitude. Thus, when diversity of marine bacterial  
474 communities was estimated from conventional clone libraries (with a few hundred clones)  
475 richness estimations were on the order of a few hundred OTUs. When similar samples were  
476 analyzed by HTS (with tens of thousands of sequences per sample) the richness estimators  
477 gave numbers of several thousand OTUs (as in the present study).

478

## 479 2. Comparison of sequencing and isolation

480 The current power of massive parallel sequencing allows probing the rare biosphere  
481 (Caporaso *et al.*, 2012; Pedrós-Alió, 2012; Gibbons *et al.*, 2013), but culturing is an  
482 alternative avenue to explore it (Pedrós-Alió, 2006, Shade *et al.*, 2012). Comparing both  
483 approaches we have found that isolation retrieves some of the rarest taxa since only 24 to  
484 37% of the isolates were found in the 454-pyrosequencing data and, moreover, they were  
485 found in extremely low abundance (Figure 3, Table 2).

486

487 In principle, the low percentage of coincidence might have been due to potential PCR bias  
488 and differential DNA amplification of the sequencing techniques (Berry *et al.*, 2011; Pinto &  
489 Raskin, 2012). However, when tested *in silico*, the primers used for pyrosequencing covered  
490 the whole diversity captured by the primers used for Sanger sequencing of the isolates and  
491 therefore, a PCR bias affecting the diversity found using both methods was unlikely.

492

493 Our results showed that the deep sequencing approach failed to retrieve 76% of the  
494 bacterial cultures that were isolated in the surface sample. In a similar study, but with much

495 shallower sequencing depth (~2 000 sequences per sample), Shade *et al.* (2012) found out  
496 that 61% of their isolates were not retrieved by 454-pyrosequencing. They performed  
497 pyrosequencing of a pool of bacterial cultures isolated from soil samples instead of Sanger  
498 sequencing of each isolate as we did in this study. Thus both studies, one in soils and another  
499 in seawater, produced similar percentages.

500

501 The long tail of rare species estimated by fitting the Weibull cumulative function to the  
502 accumulation curve (Figure 2, Table 1) and by the non-parametric Chao method (Chao *et al.*,  
503 2009) (Table 1) should harbor the isolates not found with the sequencing depth applied in this  
504 study. Increasing the number of tags sequenced would slowly uncover the isolated bacteria in  
505 a logarithmic way (Figure 4). Even if the whole bacterial diversity were found by increasing  
506 the sampling depth, culturing would still be essential for the study of marine bacterial  
507 communities, especially if the target is the rare biosphere (Donachie *et al.*, 2007).

508

509 Taking advantage of other datasets previously collected from the same area of our  
510 sampling, we were able to compare 454-pyrosequencing data and cultured isolates from  
511 different times of the year and stations along a horizontal transect and a vertical profile  
512 (Table 3). The percentage of cultured isolates sequences found in the 454-pyrosequencing  
513 datasets decreased as the time between the collection of samples for isolation and  
514 pyrosequencing increased; i.e., cultures isolated from the same sample as the pyrosequencing  
515 data were found more easily in the pyrosequencing dataset than the cultures collected further  
516 away in time or space (Table 3). The consistency of this pattern within the two datasets,  
517 SUMMER and MODIVUS (Table 3), suggests that the composition of the bacteria isolated  
518 changes along the year probably following the annual succession of the marine bacterial

519 composition (Alonso-Sáez *et al.*, 2007; Alonso-Sáez *et al.*, 2008; Gilbert *et al.*, 2012).  
520 Similarly, Lekunberri *et al.* (2014) found that sequences from cultures obtained from one  
521 season of the year tended to cluster together with environmental sequences obtained at the  
522 same time of the year. These two findings suggest that the composition of rare taxa also  
523 follows an annual succession, supporting the conclusion that the environment determines the  
524 marine bacterial composition, not only of the abundant taxa but also of the rare members of  
525 the bacterial community (Galand *et al.*, 2009). The shorter length of the 454-tag sequences  
526 (and the consequent decrease in precision of taxonomy) was likely responsible for the higher  
527 percentage of cultured isolates found on the 454-pyrosequencing datasets of MODIVUS cruise  
528 (454-tags sequences of ~68 bp) than of SUMMER cruise (454-tags sequences of ~400 bp).

529

530 In conclusion, by obtaining  $10^6$  tags per sample and fitting a Weibull cumulative function  
531 we have been able to obtain a robust estimate of the richness of the bacterial assemblages in  
532 two samples at the surface and deep Mediterranean Sea. This richness is of the order of 3 000  
533 to 5 000 taxa. The comparison with cultures shows that many of the isolates are found deep  
534 within the rare biosphere, and we have determined the sequencing effort necessary to retrieve  
535 them. HTS and culturing appear as two complementary strategies to probe the fabric of the  
536 rare biosphere.

537

### 538 **Acknowledgements**

539 We thank the crews and scientists in cruises Modivus and SUMMER, both on the RV  
540 García del Cid, supported by the Spanish MICINN grants CTM2005-04795/MAR and  
541 CTM2008-03309/MAR respectively.

542 We thank F. M. Cornejo-Castillo for his advice on the method for isolates' differentiation.

543 E. Sa and V. Balagué help with bacterial culturing and PCR work is highly appreciated.

544 B. G. C. was supported by a Juan de la Cierva contract from the Spanish “Ministerio de

545 Ciencia e Innovación”. Research was funded by the Spanish “Plan Nacional de Investigación

546 Científica y Técnica” grants Marine Gems (CTM2010-20361) and Blue Genes (CTM2013-

547 48292-C3-1-R).

548



548 **References**

- 549 Alonso-Sáez L, Balagué V, Sà EL, Sánchez O, González JM, Pinhassi J, *et al.* (2007).  
550 Seasonality in bacterial diversity in north-west Mediterranean coastal waters: assessment  
551 through clone libraries, fingerprinting and FISH. *FEMS Microbiol Ecol* **60**:98–112.  
552 Alonso-Sáez L, Sánchez O, Gasol JM, Balagué V, Pedrós-Alio C. (2008). Winter-to-summer  
553 changes in the composition and single-cell activity of near-surface Arctic prokaryotes.  
554 *Environ Microbiol* **10**:2444–54.  
555 Amaral-Zettler L, Artigas LF, Baross J, Bharathi LPA, Boetius A, Chandramohan D, *et al.*  
556 (2010). A Global Census of Marine Microbes — Census of Marine Life Maps and  
557 Visualization. In: *Life in the World's Oceans: Diversity, Distribution, and Abundance.*,  
558 McIntyre., A (ed), Wiley-Blackwell, pp. 223–345.  
559 Berry D, Ben Mahfoudh K, Wagner M, Loy A. (2011). Barcoded primers used in multiplex  
560 amplicon pyrosequencing bias amplification. *Appl Environ Microbiol* **77**:7846–9.  
561 Caporaso J, Kuczynski J, Stombaugh J, Bttinger K, Bushman F, Costello E, *et al.* (2010).  
562 QIIME allows analysis of high- throughput community sequencing data. *Nature* **7**:335–  
563 336.  
564 Caporaso JG, Paszkiewicz K, Field D, Knight R, Gilbert J a. (2012). The Western English  
565 Channel contains a persistent microbial seed bank. *ISME J* **6**:1089–93.  
566 Cermeño P, Teixeira IG, Branco M, Figueiras FG, Marañón E. (2014). Sampling the limits of  
567 species richness in marine phytoplankton communities. *J Plankton Res* **36**:1135–1139.  
568 Chao A, Colwell RK, Lin C, Gotelli NJ. (2009). Sufficient Sampling for Asymptotic  
569 Minimum Species Richness Estimators. *Ecology* **90**:1125–1133.  
570 Crespo BG, Pommier T, Fernández-Gómez B, Pedrós-Alió C. (2013). Taxonomic  
571 composition of the particle-attached and free-living bacterial assemblages in the  
572 Northwest Mediterranean Sea analyzed by pyrosequencing of the 16S rRNA.  
573 *Microbiologyopen* **2**:541–552.  
574 Curtis TP, Sloan WT, Scannell JW. (2002). Estimating prokaryotic diversity and its limits.  
575 *Proc Natl Acad Sci* **99**:10494–99.  
576 DeLong E. (1997). Marine microbial diversity: the tip of the iceberg. *Trends Biotechnol*  
577 **15**:203–207.  
578 Donachie SP, Foster JS, Brown M V. (2007). Culture clash: challenging the dogma of  
579 microbial diversity. *ISME J* **1**:97–9.  
580 Dowd SE, Callaway TR, Wolcott RD, Sun Y, McKeehan T, Hagevoort RG, *et al.* (2008).  
581 Evaluation of the bacterial diversity in the feces of cattle using 16S rDNA bacterial tag-  
582 encoded FLX amplicon pyrosequencing (bTEFAP). *BMC Microbiol* **8**:125.  
583 Eilers H, Pernthaler J, Glöckner FO, Amann R. (2000). Culturability and In situ abundance of  
584 pelagic bacteria from the North Sea. *Appl Environ Microbiol* **66**:3044–51.  
585 Erwin T. (1991). How many species are there? Revisited. *Conserv Biol* **5**:1–4.  
586 Fisher MM, Triplett EW. (1999). Automated approach for ribosomal intergenic spacer  
587 analysis of microbial diversity and its application to freshwater bacterial communities.  
588 *Appl Environ Microbiol* **65**:4630–6.  
589 Flather CH. (1996). Fitting Species-Accumulation Functions and Assessing Regional Land  
590 Use Impacts on A vian Diversity Curtis H. Flather. *J Biogeogr* **23**:155–168.  
591 Galand PE, Casamayor EO, Kirchman DL, Lovejoy C. (2009). Ecology of the rare microbial  
592 biosphere of the Arctic Ocean. *Proc Natl Acad Sci* **106**:22427–22432.

- 593 Gibbons SM, Caporaso JG, Pirrung M, Field D, Knight R, Gilbert JA. (2013). Evidence for a  
594 persistent microbial seed bank throughout the global ocean. *Proc Natl Acad Sci*  
595 **110**:4651–4655.
- 596 Gilbert JA, Steele JA, Caporaso JG, Steinbrück L, Reeder J, Temperton B, *et al.* (2012).  
597 Defining seasonal marine microbial community dynamics. *ISME J* **6**:298–308.
- 598 Giovannoni SJ, Britschgi TB, Moyer CL, Field KG. (1990). Genetic diversity in Sargasso  
599 Sea bacterioplankton. *Nature* **345**:60–3.
- 600 Hagström Å, Pommier T, Rohwer F, Simu K, Svensson D, Zweifel U. (2002). Bio-  
601 informatics reveal surprisingly low species richness in marine bacterioplankton. *Appl*  
602 *Environ Microbiol* **67**:3628–3633.
- 603 Huse SM, Welch DM, Morrison HG, Sogin ML. (2010). Ironing out the wrinkles in the rare  
604 biosphere through improved OTU clustering. *Environ Microbiol* **12**:1889–98.
- 605 Jiménez-Valverde A, Mendoza SJ, Cano JM, Munguira ML. (2006). Comparing Relative  
606 Model Fit of Several Species-Accumulation Functions to Local Papilionoidea and  
607 Hesperioidea Butterfly Inventories of Mediterranean Habitats. *Biodivers Conserv*  
608 **15**:177–190.
- 609 Jones SE, Lennon JT. (2010). Dormancy contributes to the maintenance of microbial  
610 diversity. *Proc Natl Acad Sci U S A* **107**:5881–6.
- 611 Kindt R, Coe R. (2005). Tree diversity analysis. A manual and software for common  
612 statistical methods for ecological and biodiversity studies. World Agroforestry Centre  
613 (ICRAF): Nairobi (Kenya).
- 614 Lekunberri I, Gasol JM, Acinas SG, Gómez-Consarnau L, Crespo BG, Casamayor EO, *et al.*  
615 (2014). The phylogenetic and ecological context of cultured and whole genome-  
616 sequenced planktonic bacteria from the coastal NW Mediterranean Sea. *Syst Appl*  
617 *Microbiol.* **37**:216–28.
- 618 Lynch MDJ, Bartram AK, Neufeld JD. (2012). Targeted recovery of novel phylogenetic  
619 diversity from next-generation sequence data. *ISME J* **6**:2067–77.
- 620 Magurran AE. (1988). Ecological diversity and its measurements. Princeton University Press:  
621 Princeton, New Jersey.
- 622 May RM. (1988). How many species are there on Earth? *Science* **241**:1441–9.
- 623 Mora C, Tittensor DP, Adl S, Simpson AGB, Worm B. (2011). How many species are there  
624 on Earth and in the ocean? *PLoS Biol* **9**:e1001127.
- 625 Oksanen J, Guillaume-Blanchet F, Kindt R, Legendre P, Minchin P, O’Hara R, *et al.* (2013).  
626 Vegan: Community Ecology Package.
- 627 Pace NR. (1997). A molecular view of microbial diversity and the biosphere. *Science*  
628 **276**:734–40.
- 629 Pedrós-Alió C. (2006). Marine microbial diversity: can it be determined? *Trends Microbiol*  
630 **14**:257–63.
- 631 Pedrós-Alió C. (2012). The Rare Bacterial Biosphere. *Ann Rev Mar Sci* **4**:449–466.
- 632 Pedrós-Alió C, Calderón-Paz J-I, Guixa-Boixereu N, Estrada M, Gasol JM. (1999).  
633 Bacterioplankton and phytoplankton biomass and production during summer  
634 stratification in the northwestern Mediterranean Sea. *Deep Sea Res Part I Oceanogr Res*  
635 *Pap* **46**:985–1019.
- 636 Penton CR, St Louis D, Cole JR, Luo Y, Wu L, Schuur EAG, *et al.* (2013). Fungal diversity  
637 in permafrost and tallgrass prairie soils under experimental warming conditions. *Appl*  
638 *Environ Microbiol* **79**:7063–72.

- 639 Pinto AJ, Raskin L. (2012). PCR biases distort bacterial and archaeal community structure in  
640 pyrosequencing datasets. *PLoS One* **7**:e43093.
- 641 Pommier T, Neal P, Gasol J, Coll M, Acinas S, Pedrós-Alió C. (2010). Spatial patterns of  
642 bacterial richness and evenness in the NW Mediterranean Sea explored by  
643 pyrosequencing of the 16S rRNA. *Aquat Microb Ecol* **61**:221–233.
- 644 Preston FW. (1960). Time and Space and the Variation of Species. *Ecology* **41**:612–627.
- 645 Quast C, Pruesse E, Yilmaz P, Gerken J, Schweer T, Yarza P, *et al.* (2013). The SILVA  
646 ribosomal RNA gene database project: improved data processing and web-based tools.  
647 *Nucleic Acids Res* **41**:D590–6.
- 648 Quince C, Lanzen A, Davenport RJ, Turnbaugh PJ. (2011). Removing noise from  
649 pyrosequenced amplicons. *BMC Bioinformatics* **12**:38.
- 650 RCoreTeam. (2013). R: A language and environment for statistical computing.
- 651 Ritz C, Streibig J. (2005). Bioassay Analysis using R. *J Stat Softw* **12**.
- 652 Van Rooijen J. (2012). Estimating the snake species richness of the Santubong  
653 Peninsula (Borneo): a computer-simulation. *Amphibia-Reptilia* **33**:521–525.
- 654 Rosenzweig M. (1995). Species diversity in space and time. In: Cambridge University Press:  
655 Cambridge.
- 656 Rusch DB, Halpern AL, Sutton G, Heidelberg KB, Williamson S, Yooseph S, *et al.* (2007).  
657 The Sorcerer II Global Ocean Sampling expedition: northwest Atlantic through eastern  
658 tropical Pacific. *PLoS Biol* **5**:e77.
- 659 Schauer M, Balagué V, Pedrós-Alió C, Massana R. (2003). Seasonal changes in the  
660 taxonomic composition of bacterioplankton in a coastal oligotrophic system. *Aquat*  
661 *Microb Ecol* **31**:163–174.
- 662 Scheinert P, Krausse R, Ullmann U, Söller R, Krupp G. (1996). Molecular differentiation of  
663 bacteria by PCR amplification of the 16S–23S rRNA spacer. *J Microbiol Methods*  
664 **26**:103–117.
- 665 Schloss PD, Gevers D, Westcott SL. (2011). Reducing the effects of PCR amplification and  
666 sequencing artifacts on 16S rRNA-based studies. Gilbert, JA (ed). *PLoS One* **6**:e27310.
- 667 Shade A, Hogan CS, Klimowicz AK, Linske M, McManus PS, Handelsman J. (2012).  
668 Culturing captures members of the soil rare biosphere. *Environ Microbiol* **14**:2247–52.
- 669 Sogin ML, Morrison HG, Huber JA, Mark Welch D, Huse SM, Neal PR, *et al.* (2006).  
670 Microbial diversity in the deep sea and the underexplored “rare biosphere”. *Proc Natl*  
671 *Acad Sci U S A* **103**:12115–20.
- 672 Staley J, Konopka A. (1985). Measurement of in situ activities of nonphotosynthetic  
673 microroganisms in aquatic and terrestrial habitats. *Annu Rev Microbiol* **39**:321–383.
- 674 Thompson GG, Withers PC, Pianka ER, Thompson S a. (2003). Assessing biodiversity with  
675 species accumulation curves; inventories of small reptiles by pit-trapping in Western  
676 Australia. *Austral Ecol* **28**:361–383.
- 677 Wall PK, Leebens-Mack J, Chanderbali AS, Barakat A, Wolcott E, Liang H, *et al.* (2009).  
678 Comparison of next generation sequencing technologies for transcriptome  
679 characterization. *BMC Genomics* **10**:347.
- 680
- 681
- 682
- 683
- 684
- 685
- 686

686 **Figure legends**

687 Figure 1. OTU accumulation curves of the surface (orange circles) and bottom (green  
688 triangles) samples. The black line is the Weibull cumulative function fit with model  
689 efficiency of 99% ( $R^2=0.99$ ).

690

691 Figure 2. Rank-abundance plots of surface (A) and bottom (B) samples. The red line is the  
692 rank-abundance plot calculated with the actual data. The blue lines show the estimates of the  
693 sampling effort necessary to retrieve 99% (dark blue) or 99.9% (light blue) of the total  
694 estimated richness calculated by extrapolation of the species accumulation curve using the  
695 Weibull cumulative function. The vertical black line separates the real data (left) from the  
696 estimates (right). The percentage of cultured isolates found in the 454-pyrosequencing  
697 datasets is indicated at the left side of the black vertical line. The percentage of cultured  
698 isolates not found in the 454-pyrosequencing datasets, and that would presumably be found  
699 by increasing the sampling effort, is indicated at the right of the black vertical line. Insert  
700 pictures show some of the bacterial cultures grown from the surface sample. Font size and  
701 pictures are scaled according to the percentage of cultured isolates found or not found in the  
702 454-pyrosequencing datasets.

703

704 Figure 3. Rank-abundance plot of the 38 isolated bacterial species. The maroon squares  
705 indicate the cultured isolates found in both the surface and bottom 454-pyrosequencing  
706 datasets, the green triangles indicate the cultures isolated found only in the bottom 454-  
707 pyrosequencing dataset, and the white circles indicate the cultures that were not found in any  
708 of the 454-pyrosequencing datasets. A list of the isolated bacterial species can be found in  
709 Table 2 and supplementary Table 2.

710 Figure 4. Accumulation curves of the percentage of cultured isolated found in the 454-  
711 pyrosequencing datasets (surface sample: A, C and bottom sample: B, D) when increasing the  
712 number of sampled OTUs (A, B) and Tags (C, D).

713

714

715

716

717

718

719

720

721

722

723

724

725

726

727

728 Table 1. Summary of location and depth (m) of samples, total sequences before (Raw Tags)  
 729 and after (Final Tags) cleaning, richness (S) computed as total Operational Taxonomic Units  
 730 (OTUs) clustered at 97% identity, percentage of singletons. Diversity estimates according to  
 731 the Shannon diversity index ( $H'$ ), Simpson diversity (D) and Pielou's evenness (J). Richness  
 732 (S) estimates according the non-parametric methods Chao Index ( $S_{Chao}$ ) and Abundance-  
 733 base Coverage Estimator (ACE) ( $S_{ACE}$ ) and the fitting of the accumulation curve to a Weibull  
 734 Cumulative three parameter function ( $S_{WeibullFit}$ ) which model efficiency was 99% for the  
 735 surface and the bottom samples fitting (see Fig. 1). Estimates of the sampling effort (number  
 736 of Tags) that would be needed to obtained the 99% and 99.9% of the total richness estimated  
 737 by the Chao Index ( $S_{Chao}$ ) and the Weibull cumulative function fitting ( $S_{WeibullFit}$ ).

|                                                 | Surface            | Bottom             |
|-------------------------------------------------|--------------------|--------------------|
| Lat, Long                                       | 40°52'N, 02°47'E   | 40°52'N, 02°47'E   |
| Depth (m)                                       | 5                  | 2 000              |
| Raw Tags                                        | 713 076            | 970 346            |
| Final Tags                                      | 500 262            | 574 960            |
| OTUs 97 % identity (S)                          | 1 400              | 4 460              |
| Singletons (% OTUs)                             | 17.86              | 17.20              |
| Diversity estimates:                            |                    |                    |
| $H'$ (Shannon diversity index)                  | 3.26               | 4.75               |
| D (Simpson diversity)                           | 0.45               | 0.66               |
| $J'$ (Pielou's evenness)                        | 0.45               | 0.57               |
| Richness estimates (estimated S):               |                    |                    |
| Chao Index ( $S_{Chao}$ )                       | 1 643              | 5 029              |
| ACE ( $S_{ACE}$ )                               | 1 556              | 4 924              |
| Weibull Cumulative Fitting ( $S_{WeibullFit}$ ) | 1 519              | 4 946              |
| Sampling effort estimates (Number of Tags) for: |                    |                    |
| 99 % of $S_{Chao}$                              | $1.33 \times 10^6$ | $1.04 \times 10^6$ |
| 99.9 % of $S_{Chao}$                            | $2.47 \times 10^6$ | $2.03 \times 10^6$ |
| 99 % of $S_{WeibullFit}$                        | $1.92 \times 10^6$ | $1.96 \times 10^6$ |
| 99.9 % of $S_{WeibullFit}$                      | $4.02 \times 10^6$ | $3.91 \times 10^6$ |

738

739

735 Table 2. Isolates' closest relative according to BLAST results, % of identity with the BLAST reference strain (identity BLAST),  
736 GenBank accession number of the BLAST reference strain, number of tags matching the isolates sequences in the surface and bottom  
737 samples (Tags in Surface, Tags in Bottom), percentage of the tags in the surface and bottom samples (% Surface, % Bottom) and number  
738 of isolates of each taxa sequenced. *Actino* (*Actinobacteria*), *Bact* (*Bacteroidetes*), *Firm* (*Firmicutes*), *Alpha-P* (*Alpha-Proteobacteria*)  
739 and *Gamma-P* (*Gamma-Proteobacteria*).

| Isolates' closest relative                                      | Identity BLAST | GenBank accession number | Tags in Surface | % Surface             | Tags in Bottom | % Bottom              | Isolates number |
|-----------------------------------------------------------------|----------------|--------------------------|-----------------|-----------------------|----------------|-----------------------|-----------------|
| <i>Uncultured Brevundimonas</i> sp. (Alpha-P)                   | 99.9 %         | JX047099                 | 76              | 1.52x10 <sup>-2</sup> | 172            | 2.99x10 <sup>-2</sup> | 1               |
| <i>Alteromonas macleodii</i> str. 'Balearic Sea AD45' (Gamma-P) | 100 %          | CP003873                 | 40              | 8.00x10 <sup>-3</sup> | 7526           | 1.31                  | 2               |
| <i>Sphingobium olei</i> (Alpha-P)                               | 100 %          | HQ398416                 | 34              | 6.80x10 <sup>-3</sup> | 232            | 4.04x10 <sup>-2</sup> | 8               |
| <i>Erythrobacter citreus</i> (Alpha-P)                          | 100 %          | EU440970                 | 31              | 6.20x10 <sup>-3</sup> | 861            | 1.50x10 <sup>-1</sup> | 37              |
| <i>Citromicrobium</i> sp.(Alpha-P)                              | 100 %          | HQ871848                 | 22              | 4.40x10 <sup>-3</sup> | 39             | 6.78x10 <sup>-3</sup> | 1               |
| <i>Acinetobacter baumannii</i> (Gamma-P)                        | 100 %          | JX966437                 | 16              | 3.20x10 <sup>-3</sup> | 128            | 2.23x10 <sup>-2</sup> | 4               |
| <i>Bizionia</i> sp. ( <i>Bact</i> )                             | 100 %          | EU143366                 | 13              | 2.60x10 <sup>-3</sup> | 66             | 1.15x10 <sup>-2</sup> | 1               |
| <i>Muricauda ruestringensis</i> ( <i>Bact</i> )                 | 99 %           | JN791391                 | 4               | 8.00x10 <sup>-4</sup> | 92             | 1.60x10 <sup>-2</sup> | 2               |
| <i>Microbacterium jejuense</i> ( <i>Actino</i> )                | 100 %          | AM778450                 | 1               | 2.00x10 <sup>-4</sup> | 15             | 2.61x10 <sup>-3</sup> | 1               |
| <i>Marinobacter flavimaris</i> (Gamma-P)                        | 100 %          | AB617558                 | 0               | 0                     | 174            | 3.03x10 <sup>-2</sup> | 5               |
| <i>Bacillus</i> sp. ( <i>Firm</i> )                             | 100 %          | AM950311                 | 0               | 0                     | 17             | 2.96x10 <sup>-3</sup> | 1               |
| <i>Bacillus horikoshii</i> ( <i>Firm</i> )                      | 100 %          | JQ904719                 | 0               | 0                     | 8              | 1.39x10 <sup>-3</sup> | 2               |
| <i>Halomonas aquamarina</i> (Gamma-P)                           | 100 %          | AB681582                 | 0               | 0                     | 1              | 1.74x10 <sup>-4</sup> | 5               |
| <i>Idiomarina seosinensis</i> (Gamma-P)                         | 99.9 %         | EU440964                 | 0               | 0                     | 1              | 1.74x10 <sup>-4</sup> | 2               |

740 Table 3. Percentage of coincidence of the 454 pyrosequencing datasets from cruises SUMMER (September 2011) and MODIVUS  
 741 (September 2007) with cultures covering the specific hypervariable regions sequenced in each cruise. The cultures belonged to four  
 742 culture collections from the NW Mediterranean. The — symbol indicates that the comparison was not significant due to the low number  
 743 of cultures with V1-V3 regions in the BBMO-3 culture collection. The comparison was Not Applicable (NA) when the samples  
 744 compared did not belong to the same sampling site. The highest percentages of coincidences are indicated in bold type. BBMO means  
 745 Blanes Bay Microbial Observatory.

| A) Culture collection | B) SUMMER 454 sequences (September 2011) |                            | C) MODIVUS 454 sequences (September 2007) |                            |                             |                                |                               |                |
|-----------------------|------------------------------------------|----------------------------|-------------------------------------------|----------------------------|-----------------------------|--------------------------------|-------------------------------|----------------|
|                       | 1                                        | 2                          | 3                                         | 4                          | 5                           | 6 <sup>b</sup>                 | 7 <sup>b</sup>                | 8 <sup>b</sup> |
|                       | # cultures <sup>a</sup>                  | % found with all sequences | # cultures <sup>a</sup>                   | % found with all sequences | % found with BBMO sequences | % found with Open-Sea, Surface | % found with Open-Sea, Bottom |                |
| BBMO-1 (2001-2004)    | 65                                       | 8%                         | 39                                        | 44%                        | 23%                         | NA                             | NA                            |                |
| BBMO-2 (Feb 2007)     | 11                                       | 9%                         | 20                                        | 80%                        | 40%                         | NA                             | NA                            |                |
| BBMO-3 (Sept 2007)    | 2                                        | —                          | 6                                         | <b>83%</b>                 | <b>67%</b>                  | NA                             | NA                            |                |
| SUMMER (Sept 2011)    | 38                                       | <b>37%</b>                 | 38                                        | 74%                        | NA                          | 26%                            | <b>34%</b>                    |                |

746 <sup>a</sup> Number of cultures in each collection where the sequence available matched the region targeted in the 454 sequencing (V1-V3  
 747 in Summer and V6 in MODIVUS).

748 <sup>b</sup> Comparison of the culture collections and the 454 pyrosequencing data of the sample collected at the same site as the sample  
 749 for culture isolation.

750



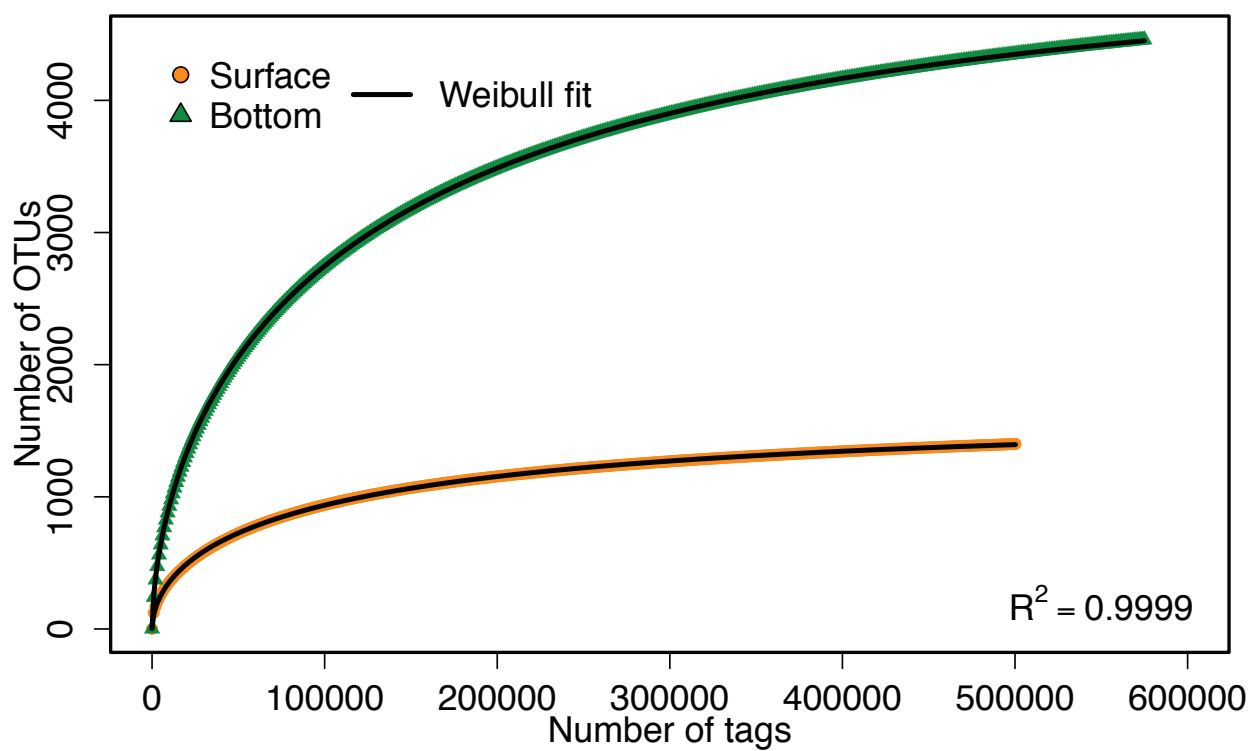

Figure 1  
Crespo et al.

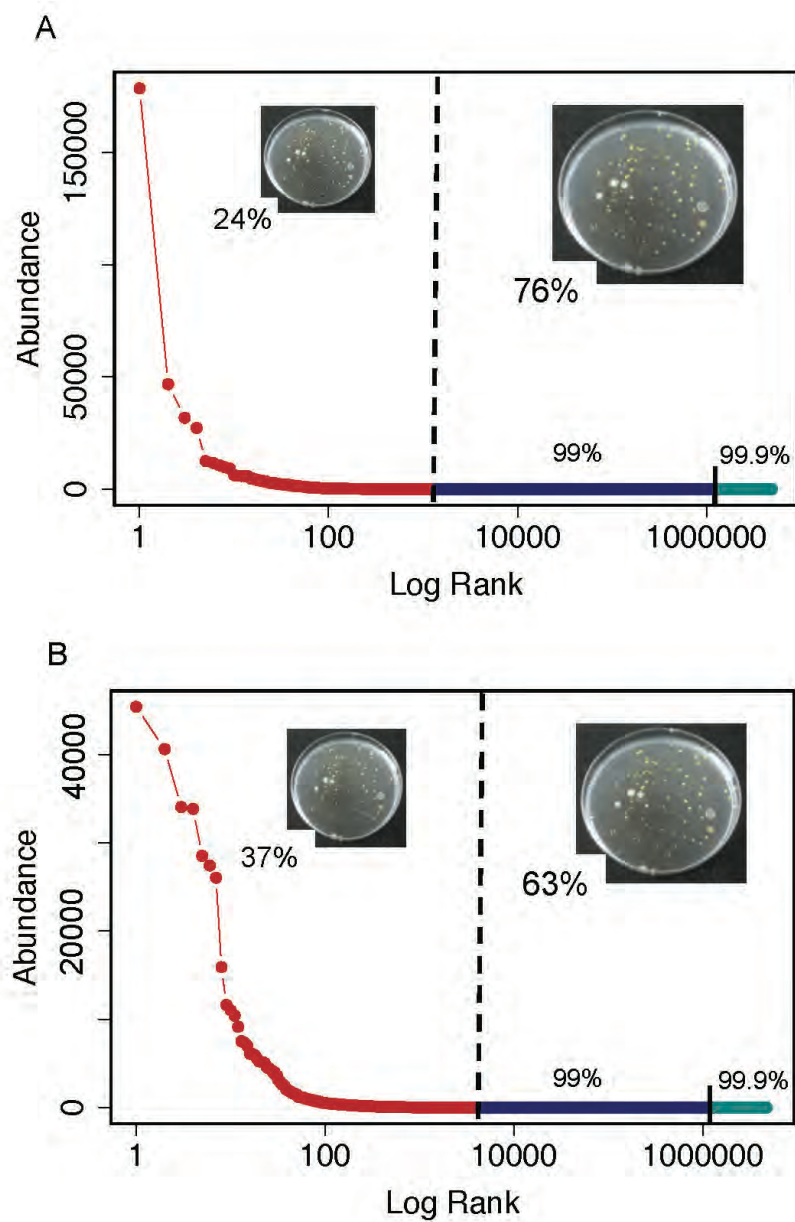

Figure 2  
Crespo et al.

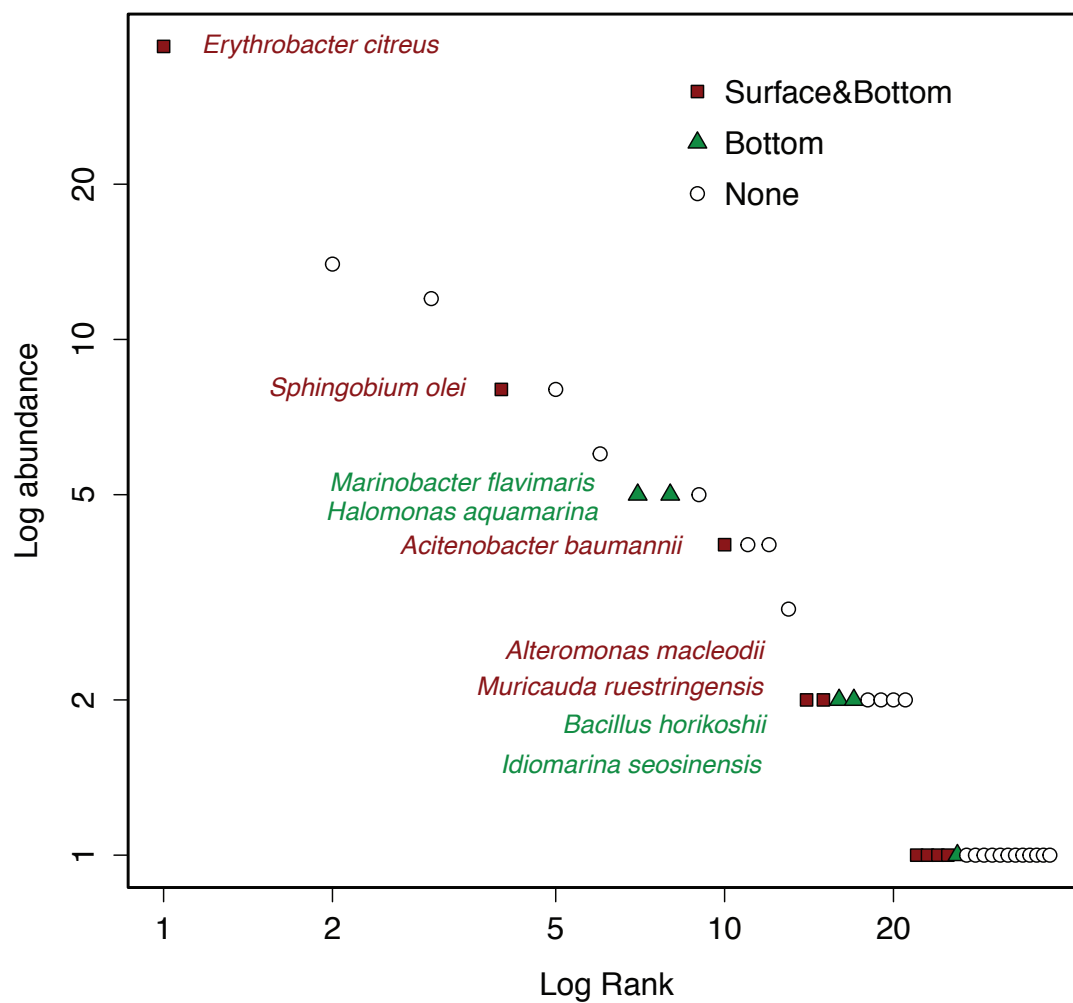

Figure 3  
Crespo et al.

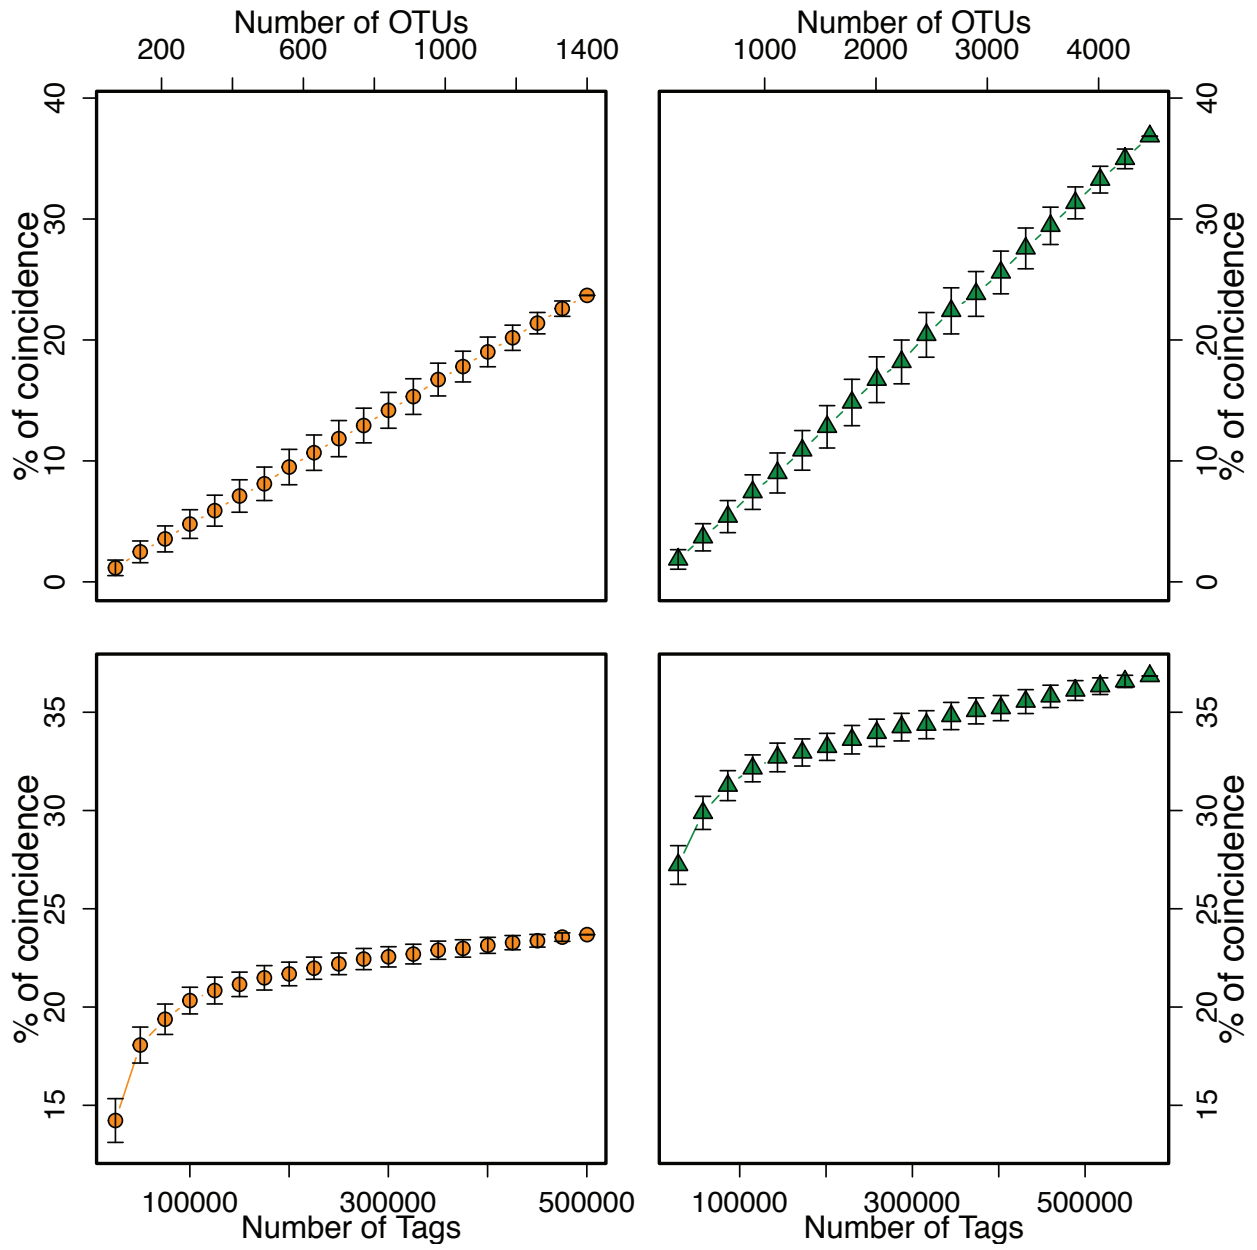

Figure 4  
Crespo et al.
